# Supplementary material for: Macrophage scavenger receptor 1 controls Chikungunya virus infection through autophagy in mice
Source: PubMed Central journal article supplement (PMC7545163; doi:10.1038/s42003-020-01285-6), 2020-10-08
Supplement: 42003_2020_1285_MOESM2_ESM.pdf [file 42003_2020_1285_MOESM2_ESM.pdf]

## **Description of Additional Supplementary Files**

**File Name:** **Supplementary Data 1**

**Description:** the source data for the Figures and Tables
